# Supplementary material for: VgrG and PAAR Proteins Define Distinct Versions of a Functional Type VI Secretion System
Source: PubMed Central journal article supplement (PMC4924876; doi:10.1371/journal.ppat.1005735), 2016-06-28
Supplement: ppat.1005735.s009.pdf [file ppat.1005735.s009.pdf]

**S1 Table. Bacterial strains and plasmids used in this study.**

| <b>Name</b>                | <b>Description</b>                                                                                                                         | <b>Source / Reference</b> |
|----------------------------|--------------------------------------------------------------------------------------------------------------------------------------------|---------------------------|
| <i>Strains</i>             |                                                                                                                                            |                           |
| <i>Serratia marcescens</i> |                                                                                                                                            |                           |
| Db10                       | Wild type                                                                                                                                  | [1]                       |
| SJC3                       | Db10 $\Delta tssH$ ( $\Delta SMDB11\_2274$ )                                                                                               | [2]                       |
| SJC11                      | Db10 $\Delta tssE$ ( $\Delta SMDB11\_2271$ )                                                                                               | [2]                       |
| FRA02                      | Db10 $\Delta vgrG1$ ( $\Delta SMDB11\_2244$ )                                                                                              | This study                |
| FRA01                      | Db10 $\Delta vgrG2$ ( $\Delta SMDB11\_2276$ )                                                                                              | This study                |
| FRA03                      | Db10 $\Delta vgrG1\Delta vgrG2$                                                                                                            | This study                |
| FRC32                      | Db10 $\Delta paar1$ ( $\Delta SMDB11\_2250$ )                                                                                              | This study                |
| MJF15                      | Db10 $\Delta rhs1$ ( $\Delta SMDB11\_2278$ )                                                                                               | [3]                       |
| JAD13                      | Db10 $\Delta rhs2$ ( $\Delta SMDB11\_1610$ )                                                                                               | [3]                       |
| JAD14                      | Db10 $\Delta rhs1\Delta rhs2$                                                                                                              | [3]                       |
| FRC25                      | Db10 $\Delta paar\Delta rhs1\Delta rhs2$                                                                                                   | This study                |
| FRC27                      | Db10 $\Delta vgrG1\Delta paar1$                                                                                                            | This study                |
| FRC26                      | Db10 $\Delta vgrG2\Delta paar1$                                                                                                            | This study                |
| FRC28                      | Db10 $\Delta vgrG1\Delta rhs1$                                                                                                             | This study                |
| FRC29                      | Db10 $\Delta vgrG1\Delta rhs2$                                                                                                             | This study                |
| FRC30                      | Db10 $\Delta vgrG1\Delta rhs1\Delta rhs2$                                                                                                  | This study                |
| FRC31                      | Db10 $\Delta vgrG2\Delta rhs1\Delta rhs2$                                                                                                  | This study                |
| JAD12                      | Db10 $\Delta eagR1$ ( $\Delta SMDB11\_2277$ )                                                                                              | [3]                       |
| JAD34                      | Db10 $\Delta eagR2$ ( $\Delta SMDB11\_1609$ )                                                                                              | This study                |
| FRC06                      | Db10 $\Delta hcp1$ ( $\Delta SMDB11\_2263$ )                                                                                               | This study                |
| FRC07                      | Db10 $\Delta hcp2$ ( $\Delta SMDB11\_3455$ )                                                                                               | This study                |
| FRC08                      | Db10 $\Delta hcp3$ ( $\Delta SMDB11\_3456$ )                                                                                               | This study                |
| FRC21                      | Db10 VgrG1-His (encodes VgrG1 [SMDB11_2244] with a C-terminal His <sub>6</sub> tag at the native chromosomal location)                     | This study                |
| FRC17                      | Db10 VgrG2-His (encodes VgrG2 [SMDB11_2276] with a C-terminal His <sub>6</sub> tag at the native chromosomal location)                     | This study                |
| FRC37                      | Db10 VgrG1-His, $\Delta vgrG2$ (encodes VgrG1 with a C-terminal His <sub>6</sub> tag in a $\Delta vgrG2$ background)                       | This study                |
| FRC38                      | Db10 VgrG2-His, $\Delta vgrG1$ (encodes VgrG2 with a C-terminal His <sub>6</sub> tag in a $\Delta vgrG1$ background)                       | This study                |
| FRC55                      | Db10 VgrG2-His, $\Delta tssE$ (encodes VgrG2 with a C-terminal His <sub>6</sub> tag in a $\Delta tssE$ background )                        | This study                |
| FRC56                      | Db10 VgrG2-His, $\Delta rhs1$ (encodes VgrG2 with a C-terminal His <sub>6</sub> tag in a $\Delta rhs1$ background )                        | This study                |
| FRC57                      | Db10 VgrG2-His, $\Delta rhs2$ (encodes VgrG2 with a C-terminal His <sub>6</sub> tag in a $\Delta rhs2$ background )                        | This study                |
| FRC58                      | Db10 VgrG2-His, $\Delta rhs1\Delta rhs2$ (encodes VgrG2 with a C-terminal His <sub>6</sub> tag in a $\Delta rhs1\Delta rhs2$ background)   | This study                |
| JAD35                      | Db10 VgrG2-His, $\Delta rhs1\Delta eagR2$ (encodes VgrG2 with a C-terminal His <sub>6</sub> tag in a $\Delta rhs1\Delta eagR2$ background) | This study                |
| FRC41                      | Db10 Ssp4-HA (encodes Ssp4 [SMDB11_3980] with a C-terminal HA tag at the native chromosomal location)                                      | This study                |

|                                |                                                                                                                                                        |            |
|--------------------------------|--------------------------------------------------------------------------------------------------------------------------------------------------------|------------|
| FRC53                          | Db10 Ssp4-HA, $\Delta tssE$ (encodes Ssp4 with a C-terminal HA tag in a $\Delta tssE$ background)                                                      | This study |
| FRC54                          | Db10 Ssp4-HA, $\Delta tssE\Delta hcp1$ (encodes Ssp4 with a C-terminal HA tag in a $\Delta tssE$ , $\Delta hcp1$ [ $\Delta SMDB11\_2263$ ] background) | This study |
| JAD18                          | Db10 FLAG-Rhs1 (encodes Rhs1 with an N-terminal 3xFLAG tag at the native chromosomal location)                                                         | This study |
| FRC34                          | Db10 $\Delta slp$ ( $\Delta SMDB11\_0927$ )                                                                                                            | This study |
| FRC39                          | Db10 $\Delta 0927-0929$ ( $\Delta SMDB11\_0927-SMDB11\_0929$ )                                                                                         | This study |
| FRC40                          | Sm-resistant derivative of FRC39 ( $\Delta 0927-0929$ )                                                                                                | This study |
| JAD09                          | Db10 $\Delta rhs1\Delta tssH$ , Sm-resistant (Rhs1-susceptible target strain)                                                                          | [3]        |
| JAD17                          | Db10 $\Delta rhs2\Delta rhsI2$ , Sm-resistant (Rhs2-susceptible target strain)                                                                         | [3]        |
| KT63                           | Db10 $\Delta ssp2\Delta rap2a$ , Sm-resistant (Ssp2-susceptible target strain)                                                                         | [4]        |
| JAD06                          | Db10 $\Delta ssp4\Delta sip4$ , Sm-resistant (Ssp4-susceptible target strain)                                                                          | [5]        |
| SJC17                          | Sm-resistant derivative of <i>S. marcescens</i> ATCC 274                                                                                               | [2]        |
| <i>Pseudomonas fluorescens</i> |                                                                                                                                                        |            |
| KT02                           | Sm-resistant derivative of <i>P. fluorescens</i> 55                                                                                                    | [2]        |
| <i>Escherichia coli</i>        |                                                                                                                                                        |            |
| MC4100                         | Model K-12 strain; Sm-resistant ( <i>rpsL150</i> )                                                                                                     | [6]        |
| CC118 $\lambda pir$            | Cloning host and donor strain for pKNG101-derived allelic exchange plasmids ( $\lambda pir$ )                                                          | [7]        |
| HH26                           | Mobilizing strain for conjugal transfer                                                                                                                | [8]        |
| pNJ5000                        | MG1655 $\Delta cyaA::apr$                                                                                                                              | F. Sargent |
| <b>Plasmids</b>                |                                                                                                                                                        |            |
| pKNG101                        | Suicide vector for allelic exchange (Sm <sup>R</sup> <i>sacBR mobRK2 oriR6K</i> )                                                                      | [9]        |
| pSUPROM                        | Vector for constitutive expression of cloned genes under the control of the <i>E. coli tat</i> promoter (Kn <sup>R</sup> )                             | [10]       |
| pBAD18-Kn                      | Vector for arabinose-inducible expression of cloned genes under the control of the P <sub>ara</sub> promoter.                                          | [11]       |
| pUT18                          | Bacterial Two Hybrid plasmid (for fusion of protein of interest with C-terminal T18 fragment of CyaA; Ap <sup>R</sup> )                                | [12]       |
| pT25                           | Bacterial Two Hybrid plasmid (for fusion of protein of interest with N-terminal T25 fragment of CyaA; Cm <sup>R</sup> )                                | [13]       |
| pSC601                         | pKNG101-derived allelic exchange plasmid for the generation of chromosomal in-frame $\Delta SMDB11\_2276$ ( $\Delta vgrG2$ ) deletion                  | This study |
| pSC602                         | pKNG101-derived allelic exchange plasmid for the generation of chromosomal in-frame $\Delta SMDB11\_2244$ ( $\Delta vgrG1$ ) deletion                  | This study |
| pSC733                         | pKNG101-derived allelic exchange plasmid for the generation of chromosomal in-frame $\Delta SMDB11\_2250$ ( $\Delta paar1$ ) deletion                  | This study |
| pSC1050                        | pKNG101-derived allelic exchange plasmid for the generation of chromosomal in-frame $\Delta SMDB11\_1609$ ( $\Delta eagR2$ ) deletion                  | This study |
| pSC706                         | pKNG101-derived allelic exchange plasmid for the generation of chromosomal in-frame $\Delta SMDB11\_2263$ ( $\Delta hcp1$ ) deletion                   | This study |
| pSC707                         | pKNG101-derived allelic exchange plasmid for the generation of chromosomal in-frame $\Delta SMDB11\_3455$ ( $\Delta hcp2$ ) deletion                   | This study |
| pSC708                         | pKNG101-derived allelic exchange plasmid for the generation of chromosomal in-frame $\Delta SMDB11\_3456$ ( $\Delta hcp3$ ) deletion                   | This study |
| pSC737                         | pKNG101-derived allelic exchange plasmid for the generation of chromosomal in-frame $\Delta SMDB11\_0927$ ( $\Delta slp$ ) deletion                    | This study |

|         |                                                                                                                                                                       |            |
|---------|-----------------------------------------------------------------------------------------------------------------------------------------------------------------------|------------|
| pSC739  | pKNG101-derived allelic exchange plasmid for the generation of chromosomal in-frame $\Delta$ <i>SMDB11_0927-0929</i> deletion                                         | This study |
| pSC727  | pKNG101-derived allelic exchange plasmid for the incorporation of a <i>vgrG1-His</i> ( <i>SMDB11_2244-His<sub>6</sub></i> ) allele at the normal chromosomal location | This study |
| pSC728  | pKNG101-derived allelic exchange plasmid for the incorporation of a <i>vgrG2-His</i> ( <i>SMDB11_2276-His<sub>6</sub></i> ) allele at the normal chromosomal location | This study |
| pSC754  | pKNG101-derived allelic exchange plasmid for the incorporation of an <i>ssp4-HA</i> ( <i>SMDB11_3980-HA</i> ) allele at the normal chromosomal location               | This study |
| pSC671  | pKNG101-derived allelic exchange plasmid for the incorporation of a <i>FLAG-rhs1</i> ( <i>3xFLAG-SMDB11_2278</i> ) allele at the normal chromosomal location          | This study |
| pSC622  | Coding sequence for VgrG1 ( <i>SMDB11_2244</i> ) in pSUPROM                                                                                                           | This study |
| pSC623  | Coding sequence for VgrG2 ( <i>SMDB11_2276</i> ) in pSUPROM                                                                                                           | This study |
| pSC715  | Coding sequence for Hcp1 ( <i>SMDB11_2263</i> ) in pSUPROM                                                                                                            | This study |
| pSC734  | Coding sequence for Paar1 ( <i>SMDB11_2250</i> ) in pSUPROM                                                                                                           | This study |
| pSC772  | Coding sequence for Slp ( <i>SMDB11_0927</i> ) in pSUPROM                                                                                                             | This study |
| pSC788  | Coding sequence for Rhs2 + RhsI2 ( <i>SMDB11_1610 + 1611</i> ) in pSUPROM                                                                                             | This study |
| pSC643  | Coding sequence for Rhs1 ( <i>SMDB11_2278</i> ) in pBAD18-Kn                                                                                                          | [3]        |
| pSC791  | Coding sequence for Rhs1 + RhsI1 ( <i>SMDB11_2278 +2278A</i> ) in pBAD18-Kn                                                                                           | This study |
| pSC697  | Coding sequence for FLAG-Rhs1 ( <i>SMDB11_2278</i> ) in pBAD18-Kn                                                                                                     | This study |
| pSC699  | Coding sequence for Rhs1 <sup>NT</sup> ( <i>SMDB11_2278</i> ; amino acids 1-422) in pUT18                                                                             | This study |
| pSC700  | Coding sequence for Rhs2 <sup>NT</sup> ( <i>SMDB11_1610</i> ; amino acids 1-363) in pUT18                                                                             | This study |
| pSC688  | Coding sequence for EagR1 ( <i>SMDB11_2277</i> ) in pT25                                                                                                              | This study |
| pSC689  | Coding sequence for EagR2 ( <i>SMDB11_1609</i> ) in pT25                                                                                                              | This study |
| pSC048  | Coding sequence for TssK ( <i>SMDB11_2253</i> ) in pUT18                                                                                                              | This study |
| pSC053  | Coding sequence for TssK ( <i>SMDB11_2253</i> ) in pT25                                                                                                               | This study |
| pSC690  | Coding sequence for Rhs1 <sup>NT</sup> ( <i>SMDB11_2278</i> ; amino acids 1-422) in pT25                                                                              | This study |
| pSC686  | Coding sequence for EagR1 ( <i>SMDB11_2277</i> ) in pUT18                                                                                                             | This study |
| pSC1056 | Coding sequence for EagR2 ( <i>SMDB11_1609</i> ) in pUT18                                                                                                             | This study |

## References

1. Flyg C, Kenne K, Boman HG (1980) Insect pathogenic properties of *Serratia marcescens*: phage-resistant mutants with a decreased resistance to *Cecropia* immunity and a decreased virulence to *Drosophila*. J Gen Microbiol 120: 173-181.
2. Murdoch SL, Trunk K, English G, Fritsch MJ, Pourkarimi E, et al. (2011) The opportunistic pathogen *Serratia marcescens* utilizes Type VI secretion to target bacterial competitors. J Bacteriol 193: 6057-6069.
3. Alcoforado Diniz J, Coulthurst SJ (2015) Intraspecies Competition in *Serratia marcescens* Is Mediated by Type VI-Secreted Rhs Effectors and a Conserved Effector-Associated Accessory Protein. J Bacteriol 197: 2350-2360.
4. English G, Trunk K, Rao VA, Srikannathasan V, Hunter WN, et al. (2012) New secreted toxins and immunity proteins encoded within the Type VI secretion system gene cluster of *Serratia marcescens*. Mol Microbiol 86: 921-936.
5. Fritsch MJ, Trunk K, Diniz JA, Guo M, Trost M, et al. (2013) Proteomic identification of novel secreted antibacterial toxins of the *Serratia marcescens* Type VI secretion system. Mol Cell Proteomics 12: 2735-2749.
6. Casadaban MJ, Cohen SN (1979) Lactose genes fused to exogenous promoters in one step using a Mu-lac bacteriophage: in vivo probe for transcriptional control sequences. Proc Natl Acad Sci U S A 76: 4530-4533.
7. Herrero M, de Lorenzo V, Timmis KN (1990) Transposon vectors containing non-antibiotic resistance selection markers for cloning and stable chromosomal insertion of foreign genes in

- gram-negative bacteria. *J Bacteriol* 172: 6557-6567.
8. Grinter NJ (1983) A broad-host-range cloning vector transposable to various replicons. *Gene* 21: 133-143.
  9. Kaniga K, Delor I, Cornelis GR (1991) A wide-host-range suicide vector for improving reverse genetics in gram-negative bacteria: inactivation of the *blaA* gene of *Yersinia enterocolitica*. *Gene* 109: 137-141.
  10. Jack RL, Buchanan G, Dubini A, Hatzixanthis K, Palmer T, et al. (2004) Coordinating assembly and export of complex bacterial proteins. *EMBO J* 23: 3962-3972.
  11. Guzman LM, Belin D, Carson MJ, Beckwith J (1995) Tight regulation, modulation, and high-level expression by vectors containing the arabinose P<sub>BAD</sub> promoter. *J Bacteriol* 177: 4121-30.
  12. Karimova G, Ullmann A, Ladant D (2001) Protein-protein interaction between *Bacillus stearothermophilus* tyrosyl-tRNA synthetase subdomains revealed by a bacterial two-hybrid system. *J Mol Microbiol Biotechnol* 3: 73-82.
  13. Karimova G, Pidoux J, Ullmann A, Ladant D (1998) A bacterial two-hybrid system based on a reconstituted signal transduction pathway. *Proc Natl Acad Sci U S A* 95: 5752-5756.
