# Supplementary material for: VgrG and PAAR Proteins Define Distinct Versions of a Functional Type VI Secretion System
Source: PubMed Central journal article supplement (PMC4924876; doi:10.1371/journal.ppat.1005735), 2016-06-28
Supplement: ppat.1005735.s010.pdf [file ppat.1005735.s010.pdf]

**S2 Table. Oligonucleotide primers for plasmid construction.**

| <b>Plasmid</b> | <b>Sequence of relevant primers (5'-3')<sup>1</sup></b> | <b>Description</b>                                                                                                       |
|----------------|---------------------------------------------------------|--------------------------------------------------------------------------------------------------------------------------|
| pSC601         | TATA <u>CTAG</u> AATTCTCGCGGCCGATGATG                   | Forward primer to clone upstream region of SMDB11_2276 in pKNG101 ( <i>Xba</i> I)                                        |
|                | TATGA <u>AGCTT</u> GTCCAACATGAGAACGTCCTCTG              | Reverse primer to clone upstream region of SMDB11_2276 in pKNG101 ( <i>Hind</i> III)                                     |
|                | TGTAA <u>AGCTTTT</u> CCCCGAAATCCTGATGCC                 | Forward primer to clone downstream region of SMDB11_2276 in pKNG101 ( <i>Hind</i> III)                                   |
|                | TATAG <u>GGCCCT</u> GGTGTGGATCAGTTCATCATC               | Reverse primer to clone downstream region of SMDB11_2276 in pKNG101 ( <i>Apa</i> I)                                      |
| pSC602         | TATA <u>CTAG</u> AGCCTTTCCCCATTGAGCTG                   | Forward primer to clone upstream region of SMDB11_2244 in pKNG101 ( <i>Xba</i> I)                                        |
|                | TATAA <u>AGCTT</u> AAGACGATCCATACTATTCCCCG              | Reverse primer to clone upstream region of SMDB11_2244 in pKNG101 ( <i>Hind</i> III)                                     |
|                | TGTAA <u>AGCTT</u> GCGATCTTCTTGTAAGGGACTCC              | Forward primer to clone downstream region of SMDB11_2244 in pKNG101 ( <i>Hind</i> III)                                   |
|                | TATAG <u>TCGAC</u> ATCGCAGCGAGCAATACG                   | Reverse primer to clone downstream region of SMDB11_2244 in pKNG101 ( <i>Sa</i> II)                                      |
| pSC706         | TGTG <u>ICTAG</u> ATTAAGTGCATGCTTGCTTATCACC             | Forward primer to clone upstream region of SMDB11_2263 in pKNG101 ( <i>Xba</i> I)                                        |
|                | TACT <u>CGAGA</u> AATAGCCATAGTTTCTTCACTCTTTATT AAGGG    | Reverse primer to clone upstream region of SMDB11_2263 in pKNG101 ( <i>Xho</i> I)                                        |
|                | TACT <u>CGAGA</u> AACCGCGAAGCTTAATCTTCC                 | Forward primer to clone downstream region of SMDB11_2263 in pKNG101 ( <i>Xho</i> I)                                      |
|                | TATAG <u>GGCCCC</u> CGTAGTTTTTGAGGTACTCTTCG             | Reverse primer to clone downstream region of SMDB11_2263 in pKNG101 ( <i>Apa</i> I)                                      |
| pSC707         | TATA <u>CTAG</u> AGCTAAAGCGTTGTTCAACACG                 | Forward primer to clone upstream region of SMDB11_3455 in pKNG101 ( <i>Xba</i> I)                                        |
|                | TATAA <u>AGCTT</u> GGCCATTGTCGCCGGATC                   | Reverse primer to clone upstream region of SMDB11_3455 in pKNG101 ( <i>Hind</i> III)                                     |
|                | TATAA <u>AGCTT</u> AAAGAGAGCTAAGCGATTCTGG               | Forward primer to clone downstream region of SMDB11_3455 in pKNG101 ( <i>Hind</i> III)                                   |
|                | TATAG <u>TCGACC</u> ACCCGATTATTCGATTCTGTG               | Reverse primer to clone downstream region of SMDB11_3455 in pKNG101 ( <i>Sa</i> II)                                      |
| pSC708         | TATA <u>CTAG</u> ATTCCGAATAAAAACGACTTACTGTC             | Forward primer to clone upstream region of SMDB11_3456 in pKNG101 ( <i>Xba</i> I)                                        |
|                | TATAA <u>AGCTT</u> TGCCATGATTTTATCACCCG                 | Reverse primer to clone upstream region of SMDB11_3456 in pKNG101 ( <i>Hind</i> III)                                     |
|                | TATAA <u>AGCTT</u> AATAAAGAAAGCTAATCACATTACGGT GC       | Forward primer to clone downstream region of SMDB11_3456 in pKNG101 ( <i>Hind</i> III)                                   |
|                | TATAG <u>TCGACT</u> TCAAACCTGAAATCATTAAAGGCATTG         | Reverse primer to clone downstream region of SMDB11_3456 in pKNG101 ( <i>Sa</i> II)                                      |
| pSC727         | TATA <u>CTAG</u> AATCACCGGCAATCAGTCTTTC                 | Forward primer to clone upstream region of SMDB11_2244 in pKNG101 ( <i>Xba</i> I)                                        |
|                | TACT <u>GCAG</u> CAAGAAGATCGCCAGCGC                     | Reverse primer to clone upstream region of SMDB11_2244 in pKNG101 ( <i>Pst</i> I)                                        |
|                | TACT <u>GCAG</u> CATCATCATCATCACTAAAGGGACT CCCATGTCGAAG | Forward primer to clone downstream region of SMDB11_2244, incorporating His <sub>6</sub> tag, in pKNG101 ( <i>Pst</i> I) |
|                | TATAG <u>TCGAC</u> GATCGCAGCGAGCAATACG                  | Reverse primer to clone downstream region of SMDB11_2244 in pKNG101 ( <i>Sa</i> II)                                      |
| pSC728         | TATA <u>CTAG</u> AGACTTTATCAACGGCGATCC                  | Forward primer to clone upstream region of SMDB11_2276 in pKNG101 ( <i>Xba</i> I)                                        |

|         |                                                       |                                                                                                                                   |
|---------|-------------------------------------------------------|-----------------------------------------------------------------------------------------------------------------------------------|
|         | TATA <u>CTGCAGG</u> GATTTTCGGGAACAGCTGATC             | Reverse primer to clone upstream region of SMDB11_2276 in pKNG101 ( <i>Pst</i> I)                                                 |
|         | TATA <u>CTGCAGC</u> ATCATCATCATCACTGATGCCGACGCGGCCCTG | Forward primer to clone downstream region of SMDB11_2276, incorporating His <sub>6</sub> tag, in pKNG101 ( <i>Pst</i> I)          |
|         | TATAGGGCCCCGAAAACCGACGATCAGC                          | Reverse primer to clone downstream region of SMDB11_2244 in pKNG101 ( <i>Apa</i> I)                                               |
| pSC733  | TATA <u>TCTAGAC</u> CCAGGTCGTCAACCTGTTGC              | Forward primer to clone upstream region of SMDB11_2250 in pKNG101 ( <i>Xba</i> I)                                                 |
|         | TGTG <u>ACTAGT</u> AAACATAAAAAGGCCTCCGCAG             | Reverse primer to clone upstream region of SMDB11_2250 in pKNG101 ( <i>Spe</i> I)                                                 |
|         | TATA <u>ACTAGT</u> CTGCTTGCGCCCTGATGAC                | Forward primer to clone downstream region of SMDB11_2250 in pKNG101 ( <i>Spe</i> I)                                               |
|         | TATAGGGCCCCAGCGATAGGGGTCGTCATCATAG                    | Reverse primer to clone downstream region of SMDB11_2250 in pKNG101 ( <i>Apa</i> I)                                               |
| pSC737  | TATA <u>ACTAGT</u> TTTCATACGGCGCCTGCC                 | Forward primer to clone upstream region of SMDB11_0927 in pKNG101 ( <i>Xba</i> I)                                                 |
|         | TATA <u>ACTAGT</u> CAGGTGAATTAGTTCGCCTCG              | Reverse primer to clone upstream region of SMDB11_0927 in pKNG101 ( <i>Spe</i> I)                                                 |
|         | TATA <u>ACTAGT</u> GCCACAATCAAGGAAGAATATG             | Forward primer to clone downstream region of SMDB11_0927 in pKNG101 ( <i>Spe</i> I)                                               |
|         | TATAGGGCCCCATCGCTATCGGCGCCTTTTTTC                     | Reverse primer to clone downstream region of SMDB11_0927 in pKNG101 ( <i>Apa</i> I)                                               |
| pSC739  | TATA <u>ACTAGT</u> TTTCATACGGCGCCTGCC                 | Forward primer to clone upstream region of SMDB11_0927 in pKNG101 ( <i>Xba</i> I)                                                 |
|         | TATA <u>ACTAGT</u> CAGGTGAATTAGTTCGCCTCG              | Reverse primer to clone upstream region of SMDB11_0927 in pKNG101 ( <i>Spe</i> I)                                                 |
|         | TATA <u>ACTAGT</u> CAGGTGAATTAGTTCGCCTCG              | Forward primer to clone downstream region of SMDB11_0929 in pKNG101 ( <i>Spe</i> I)                                               |
|         | TATAGGGCCCTTCCTGTTCGGCGCCTATGTG                       | Reverse primer to clone downstream region of SMDB11_0929 in pKNG101 ( <i>Apa</i> I)                                               |
| pSC671  | TATA <u>TCTAGAG</u> GATCTCAACCAGCCTGGC                | Forward primer for 1 <sup>st</sup> PCR fragment for overlap PCR to construct 3xFLAG-SMDB11_2278 allele in pKNG101 ( <i>Xba</i> I) |
|         | CACCGTCATGGTCTTTGTAGTCCATGGCTATTGTTTCATGTGTTTCG       | Reverse primer for 1 <sup>st</sup> PCR fragment for overlap PCR to construct 3xFLAG-SMDB11_2278 allele in pKNG101                 |
|         | CGAACACAGTGAACAATAGCCATGGACTACAAAGACCATGACGGTG        | Forward primer for 2 <sup>nd</sup> PCR fragment for overlap PCR to construct 3xFLAG-SMDB11_2278 allele in pKNG101                 |
|         | GCTGCCCAGATCTCAGCCTTGTCATCGTCATCCTTGTAATC             | Reverse primer for 2 <sup>nd</sup> PCR fragment for overlap PCR to construct 3xFLAG-SMDB11_2278 allele in pKNG101                 |
|         | GATTACAAGGATGACGATGACAAGGCTGAGATCTGGGCAGC             | Forward primer for 3 <sup>rd</sup> PCR fragment for overlap PCR to construct 3xFLAG-SMDB11_2278 allele in pKNG101                 |
|         | TATAGGGCCCCGTTGATAAATACTTTACTGGAGC                    | Reverse primer for 3 <sup>rd</sup> PCR fragment for overlap PCR to construct 3xFLAG-SMDB11_2278 allele in pKNG101 ( <i>Apa</i> I) |
| pSC1050 | TATA <u>TCTAGAG</u> AAGCTGTACTGGTAATGCGC              | Forward primer to clone upstream region of SMDB11_1609 in pKNG101 ( <i>Xba</i> I)                                                 |
|         | TATAG <u>TCGAC</u> GACATGCGAGGATCCTTTTG               | Reverse primer to clone upstream region of SMDB11_1609 in pKNG101 ( <i>Sal</i> I)                                                 |
|         | TATAG <u>TCGAC</u> GGCGGCCTAACGATGAACTC               | Forward primer to clone downstream region of SMDB11_1609 in pKNG101 ( <i>Sal</i> I)                                               |

|        |                                                     |                                                                                                                                                          |
|--------|-----------------------------------------------------|----------------------------------------------------------------------------------------------------------------------------------------------------------|
|        | TATAGGGCCCCGATCGGAGACCTTATACAGCCAATC                | Reverse primer to clone downstream region of SMDB11_1609 in pKNG101 ( <i>ApaI</i> )                                                                      |
| pSC622 | TATAAGATCTATGGATCGTCTTATCATTGCG                     | Forward primer to clone SMDB11_2244 in pSUPROM ( <i>BglII</i> )                                                                                          |
|        | TATATCTAGATTACAAGAAGATCGCCAGCG                      | Reverse primer to clone SMDB11_2244 in pSUPROM ( <i>XbaI</i> )                                                                                           |
| pSC623 | TATATCTAGAATGTTGGACCGCATTATTGC                      | Forward primer to clone SMDB11_2276 in pSUPROM ( <i>XbaI</i> )                                                                                           |
|        | TATAGTCGACTCAGGATTTCCGGGAACAGC                      | Reverse primer to clone SMDB11_2276 in pSUPROM ( <i>SalI</i> )                                                                                           |
| pSC715 | TATAGGATCCATGGCTATTGATATGTTCTGAAAGTTG               | Forward primer to clone SMDB11_2263 in pSUPROM ( <i>BamHI</i> )                                                                                          |
|        | TATATCTAGATTAAGCTTCGCGGTTTTCTTG                     | Reverse primer to clone SMDB11_2263 in pSUPROM ( <i>XbaI</i> )                                                                                           |
| pSC734 | TATAGGATCCATGTTTGCCAACAGCCAAATG                     | Forward primer to clone SMDB11_2250 in pSUPROM ( <i>BamHI</i> )                                                                                          |
|        | TATATCTAGATCAGGGCGCAAGCAGCAAC                       | Reverse primer to clone SMDB11_2250 in pSUPROM ( <i>XbaI</i> )                                                                                           |
| pSC772 | TATAGGATCCGTGATAATTTGCCCATACCCTATTTAG               | Forward primer to clone SMDB11_0927 in pSUPROM ( <i>BamHI</i> )                                                                                          |
|        | TATATCTAGATCATATTCTCCCTTGATTGTGGC                   | Reverse primer to clone SMDB11_0927 in pSUPROM ( <i>XbaI</i> )                                                                                           |
| pSC697 | TATACATATGGACTACAAAGACCATGACGGTG                    | Forward primer to amplify N-term region of 3xFLAG-SMDB11_2278 from pSC671 to replace the corresponding region in pSC643 (pBAD18-Rhs1) ( <i>NdeI</i> )    |
|        | CCATAATCCCAGAAGCTTTGCG                              | Reverse primer to amplify N-term region of 3xFLAG-SMDB11_2278 from pSC671 to replace the corresponding region in pSC643 (pBAD18-Rhs1) ( <i>HindIII</i> ) |
| pSC788 | TATATCTAGAAAGGACCTTACGATGACCGAAGC                   | Forward primer to clone SMDB11_1609 and SMDB11_1610 in pSUPROM ( <i>XbaI</i> )                                                                           |
|        | TGTGGTCGACTTAAATGGTAACTATCTTATCTTTTGCTATACCCACAG    | Reverse primer to clone SMDB11_1609 and SMDB11_1610 in pSUPROM ( <i>SalI</i> )                                                                           |
| pSC791 | TGTGGAATCTCTAGAAAGAGGATGTAAAATGCAACTAGATACTTATGACGG | Forward primer to clone SMDB11_2278A into pSC643 ( <i>EcoRI</i> )                                                                                        |
|        | TGTGGAGCTCTTAATAAATTATGTTATTCCTTTTGCAATATTTTCG      | Forward primer to clone SMDB11_2278A into pSC643 ( <i>SacI</i> )                                                                                         |
| pSC699 | TATACTGCAGGTAAAGAGGAGGAGCCATGGCTGAGATCTGG           | Forward primer to clone SMDB11_2278 (amino acids 1-422) in pUT18 ( <i>PstI</i> )                                                                         |
|        | TATAGGATCCGACAGGCGGGAAGGGGTCTG                      | Reverse primer to clone SMDB11_2278 (amino acids 1-422) in pUT18 ( <i>BamHI</i> )                                                                        |
| pSC700 | TATAGTCGACGTAAAGAGGAGGTACGATGACCGAAGCGG             | Forward primer to clone SMDB11_1610 (amino acids 1-363) in pUT18 ( <i>SalI</i> )                                                                         |
|        | TATAGGATCCGAGCTCGGCTGCTCGCC                         | Reverse primer to clone SMDB11_1610 (amino acids 1-363) in pUT18 ( <i>BamHI</i> )                                                                        |
| pSC688 | TATAGGATCCAATGGATTACCTTTCCAGGAAGG                   | Forward primer to clone SMDB11_2277 in pT25 ( <i>BamHI</i> )                                                                                             |
|        | TATAGGTACCCTATTGTTCACTGTGTTCCGGTC                   | Reverse primer to clone SMDB11_2277 in pT25 ( <i>KpnI</i> )                                                                                              |
| pSC689 | TATAGGATCCAATGTCCGCTTTATCCCGCTG                     | Forward primer to clone SMDB11_1609 in pT25 ( <i>BamHI</i> )                                                                                             |
|        | TATAGGTACCTTACGCAAAGAGTTCATCGTTAGG                  | Reverse primer to clone SMDB11_1609 in pT25 ( <i>KpnI</i> )                                                                                              |
| pSC048 | TATAGCATGCGTAAAGAGGAGGTGTGATGATGAAAGATGCTCATAAGG    | Forward primer to clone SMDB11_2253 in pUT18 ( <i>SphI</i> )                                                                                             |

|         |                                                                                                                                                                                                                                                                                            |                                                                                  |
|---------|--------------------------------------------------------------------------------------------------------------------------------------------------------------------------------------------------------------------------------------------------------------------------------------------|----------------------------------------------------------------------------------|
|         | TATATCTAGAGACCGGTCCGTATGGCTGC                                                                                                                                                                                                                                                              | Reverse primer to clone SMDB11_2253 in pUT18 ( <i>Xba</i> I)                     |
| pSC053  | TATAGGATCCAATGATGAAAGATGCTCATAAGGTTGT<br>C                                                                                                                                                                                                                                                 | Forward primer to clone SMDB11_2253 in pT25 ( <i>Bam</i> HI)                     |
|         | TATAGGTACCTTACCGGTCCGTATGGCTG                                                                                                                                                                                                                                                              | Reverse primer to clone SMDB11_2253 in pT25 ( <i>Kpn</i> I)                      |
| pSC690  | TATAGGATCCAATGGCTGAGATCTGGGCAG                                                                                                                                                                                                                                                             | Forward primer to clone SMDB11_2278 (amino acids 1-422) in pT25 ( <i>Bam</i> HI) |
|         | TATAGGTACCTTACAGGCGGGAAGGGGTC                                                                                                                                                                                                                                                              | Reverse primer to clone SMDB11_2278 (amino acids 1-422) in pT25 ( <i>Kpn</i> I)  |
| pSC686  | TATAGCATGCGTAAAGAGGAGGATCCATGGATTACCT<br>TTTCCAGG                                                                                                                                                                                                                                          | Forward primer to clone SMDB_2277 in pUT18 ( <i>Sph</i> I)                       |
|         | TATATCTAGAGATTGTTCCTGTTCCGGTCAAG                                                                                                                                                                                                                                                           | Reverse primer to clone SMDB11_2277 in pUT18 ( <i>Xba</i> I)                     |
| pSC1056 | TATAGCATGCGTAAAGAGGAGGTCGCATGTCCGCTTT<br>ATCC                                                                                                                                                                                                                                              | Forward primer to clone SMDB_1609 in pUT18 ( <i>Sph</i> I)                       |
|         | TATATCTAGAGAGGCCGCCCGGTAGCTG                                                                                                                                                                                                                                                               | Reverse primer to clone SMDB11_1609 in pUT18 ( <i>Xba</i> I)                     |
| pSC754  | Synthetic insert produced by Life Technologies:<br>Comprises 550 bp immediately upstream of the stop codon of SMDB11_3980, followed by an in-frame HA tag (TATCCTTATGATGTTTCTGATTATGCA), the final five codons of SMDB11_3980 (including stop), and then 535 bp downstream of SMDB11_3980. |                                                                                  |

---

<sup>1</sup>Incorporated restriction sites for cloning into the respective vector are underlined.
